# Supplementary material for: Polydimethylsiloxane gel thickness and stiffness affect the initial adhesion of Escherichia coli and Staphylococcus aureus
Source: Royal Society of Chemistry journal article supplement (doi:10.1039/d5lp00227c), 2025-11-28
Supplement: d5lp00227c1.pdf [file d5lp00227c1.pdf]

## Electronic Supplementary Information (ESI)

### Polydimethylsiloxane Gel Thickness and Stiffness Affect the Initial

### Adhesion of *Escherichia coli* and *Staphylococcus aureus*

Brandon Barajas<sup>1</sup>, Meng-Chen Chiang<sup>1</sup>, Dylan Lechner<sup>1</sup>, Uzochi Uwazuruonye-Anyanwu<sup>1</sup> and

Jessica D. Schiffman<sup>1,2\*</sup>

<sup>1</sup>Department of Chemical and Biomolecular Engineering, University of Massachusetts Amherst, Amherst, Massachusetts 01003-9303, United States

<sup>2</sup>Materials Science and Engineering Graduate Program, University of Massachusetts Amherst, Amherst, Massachusetts 01003, United States

\*Corresponding author: Jessica D. Schiffman; Email: [schiffman@umass.edu](mailto:schiffman@umass.edu)

**Table S1.** Various Spin Rates Were Tested to Manufacture PDMS Gels with Distinct Thicknesses. The Color-Coded Sample Names Represent the Gels Used Throughout the Manuscript.

| B:C Ratio | Sample Name     | Spin Rate (rpm) | Thickness (μm) |
|-----------|-----------------|-----------------|----------------|
| 40:1      | Soft-Test 1     | 900             | 125.2 ± 29.6   |
| 40:1      | Soft-Thick      | 1000            | 101.6 ± 30.1   |
| 40:1      | Soft-Test 2     | 1400            | 67.2 ± 30      |
| 40:1      | Soft-Test 3     | 1750            | 44.3 ± 10.2    |
| 40:1      | Soft-Test 4     | 2000            | 41.2 ± 10.4    |
| 40:1      | Soft-Medium     | 2300            | 29.8 ± 9.9     |
| 40:1      | Soft-Test 5     | 2800            | 19.6 ± 5.5     |
| 40:1      | Soft-Test 6     | 3000            | 13.9 ± 5.8     |
| 40:1      | Soft-Thin       | 4000            | 8.6 ± 4.3      |
| 10:1      | Standard-Thick  | 1000            | 95.2 ± 20.5    |
| 10:1      | Standard-Medium | 1750            | 37.8 ± 9.7     |
| 10:1      | Standard-Thin   | 2500            | 13.2 ± 7.3     |
| 5:1       | Stiff-Thick     | 700             | 105.1 ± 16.4   |
| 5:1       | Stiff-Medium    | 1500            | 35.4 ± 8.4     |
| 5:1       | Stiff-Thin      | 2300            | 35.4 ± 8.4     |

**Table S2.** Young's Moduli of PDMS Gels.

| Sample   | Young's Modulus (kPa) |               |               |                       |
|----------|-----------------------|---------------|---------------|-----------------------|
|          | FFM AFM               |               |               | Rheology <sup>1</sup> |
|          | Thin                  | Medium        | Thick         | Bulk Gel              |
| Soft     | 55.5 ± 2              | 62.6 ± 9.9    | 59.29 ± 12.2  | 30 ± 12               |
| Standard | 1089 ± 255.2          | 1105.5 ± 63.9 | 1275.4 ± 63.1 | 400 ± 80              |
| Stiff    | 2500 ± 664.7          | 600.9 ± 47.1  | 1960 ± 14.1   | 1500 ± 180            |

<sup>1</sup>Data from: B. Barajas, I. S. Kurtz, A. J. Waldman and J. D. Schiffman, *ACS Appl. Mater. Interfaces*, 2023, 15, 52197–52206.

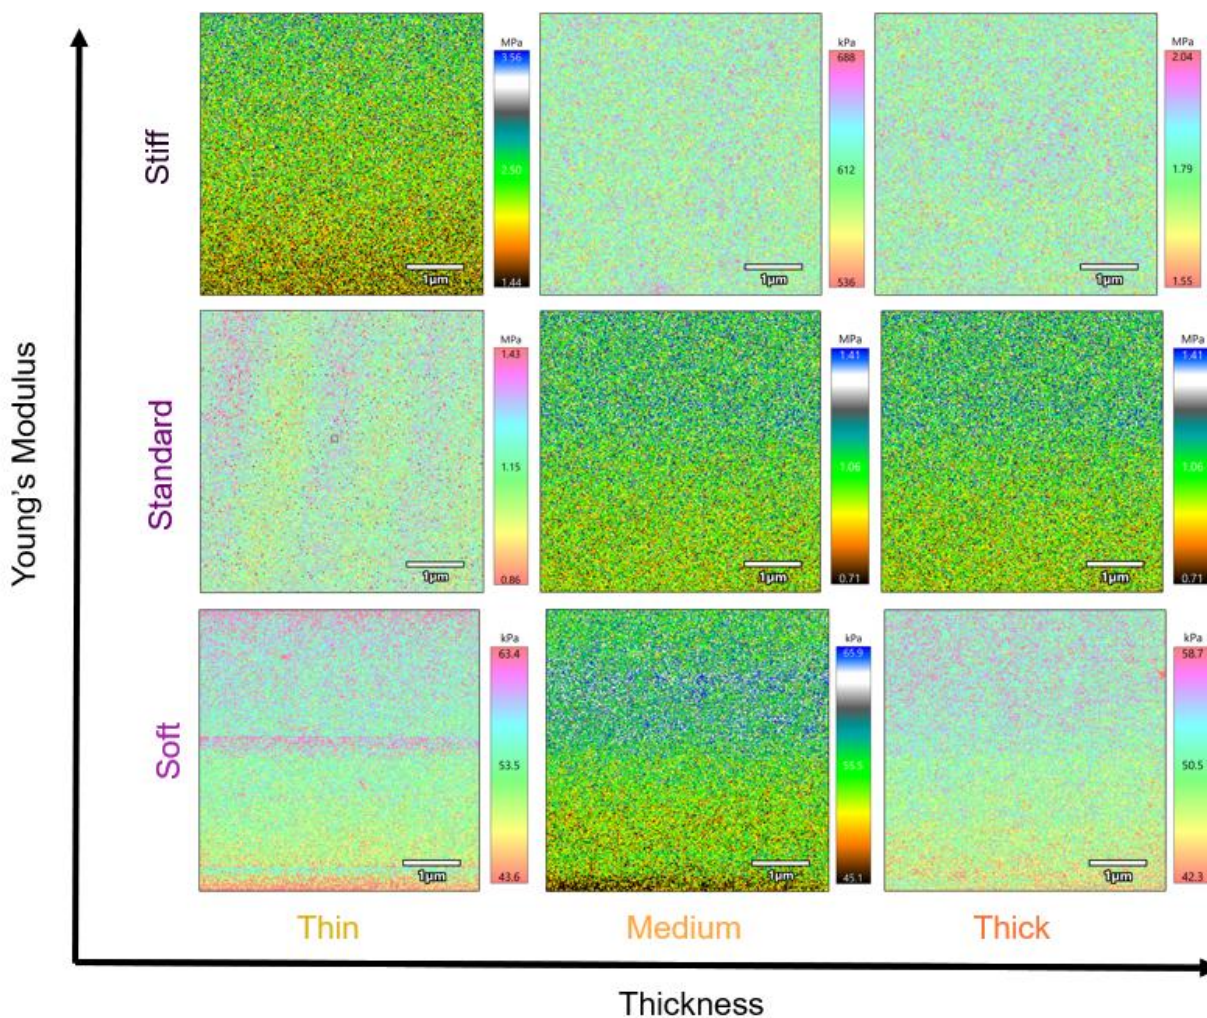

**Figure S1.** Representative Young's modulus maps acquired on spin-coated PDMS gels. A z-scale is provided alongside each image.

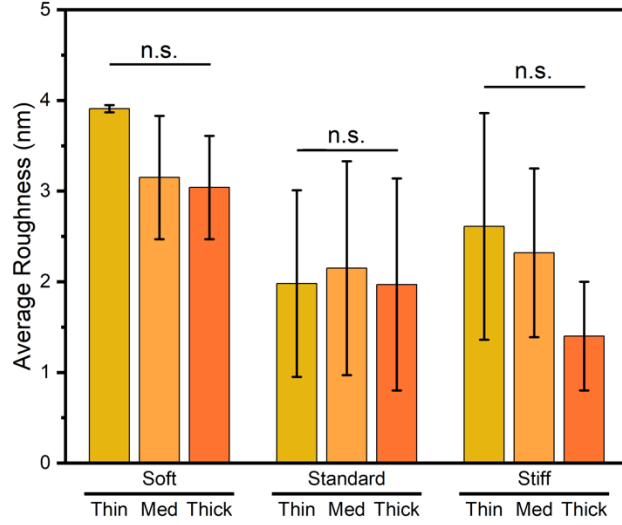

**Figure S2.** Surface roughness of spin-coated PDMS gels acquired using AFM in AC-tapping mode. Error bars represent standard deviation and n.s. indicates that the samples are not statistically different.

**Table S3.** Surface Roughness of Spin-coated PDMS Gels Quantified Across  $25 \mu\text{m}^2$ . Provided are the Root Mean Square Roughness ( $R_q$ ), Average Roughness ( $R_a$ ), Skewness ( $R_{shw}$ ), Kurtosis ( $R_{kur}$ ), Minimum Roughness ( $R_{min}$ ), and Maximum Roughness ( $R_{max}$ ). Standard Deviation is Provided.

| Sample   |        | $R_q$ (nm)      | $R_a$ (nm)      | $R_{max}$ (nm)    | $R_{min}$ (nm)    | $R_{skew}$ (nm)    | $R_{kurt}$ (nm)    |
|----------|--------|-----------------|-----------------|-------------------|-------------------|--------------------|--------------------|
| Soft     | Thin   | $4.92 \pm 0.10$ | $3.91 \pm 0.04$ | $25.0 \pm 17.3$   | $-17.7 \pm 1.94$  | $-0.38 \pm 0.48$   | $0.22 \pm 0.36$    |
|          | Medium | $3.91 \pm 0.87$ | $3.15 \pm 0.68$ | $10.45 \pm 1.19$  | $-14.31 \pm 1.92$ | $-0.42 \pm 0.30$   | $-0.10 \pm 0.27$   |
|          | Thick  | $3.77 \pm 0.60$ | $3.04 \pm 0.57$ | $10.82 \pm 2.29$  | $-17.25 \pm 1.82$ | $-0.42 \pm 0.37$   | $0.18 \pm 0.68$    |
| Standard | Thin   | $2.48 \pm 1.29$ | $1.98 \pm 1.03$ | $20.36 \pm 16.87$ | $-10.97 \pm 5.36$ | $-0.05 \pm 0.08$   | $0.44 \pm 0.41$    |
|          | Medium | $2.69 \pm 1.48$ | $2.15 \pm 1.18$ | $11.0 \pm 6.1$    | $-11.31 \pm 6.23$ | $-0.004 \pm 0.018$ | $-0.001 \pm 0.039$ |
|          | Thick  | $2.47 \pm 1.47$ | $1.97 \pm 1.17$ | $11.37 \pm 6.94$  | $-12.32 \pm 5.74$ | $0.009 \pm 0.012$  | $0.11 \pm 0.09$    |
| Stiff    | Thin   | $3.28 \pm 1.57$ | $2.61 \pm 1.25$ | $14.38 \pm 5.81$  | $-13.83 \pm 6.82$ | $0.0698 \pm 0.013$ | $0.03 \pm 0.01$    |
|          | Medium | $2.91 \pm 1.16$ | $2.32 \pm 0.93$ | $11.94 \pm 5.15$  | $-13.86 \pm 5.68$ | $-0.10 \pm 0.08$   | $-0.007 \pm 0.116$ |
|          | Thick  | $1.78 \pm 0.76$ | $1.40 \pm 0.60$ | $8.03 \pm 3.97$   | $-10.99 \pm 5.62$ | $-0.25 \pm 0.19$   | $0.34 \pm 0.22$    |



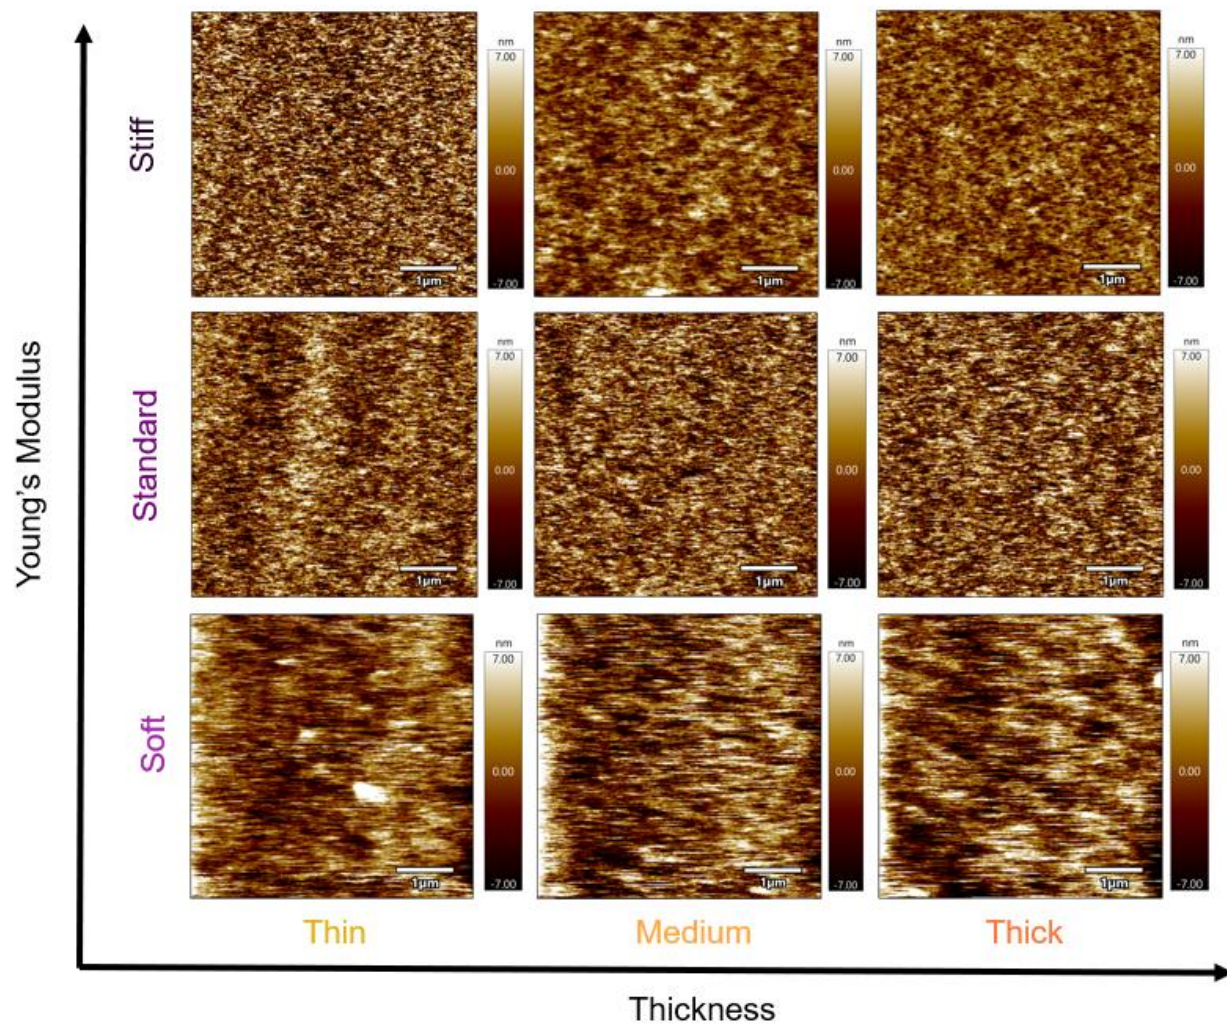

**Figure S3.** Representative topography images acquired on spin-coated PDMS gels. A z-scale is provided alongside each image.

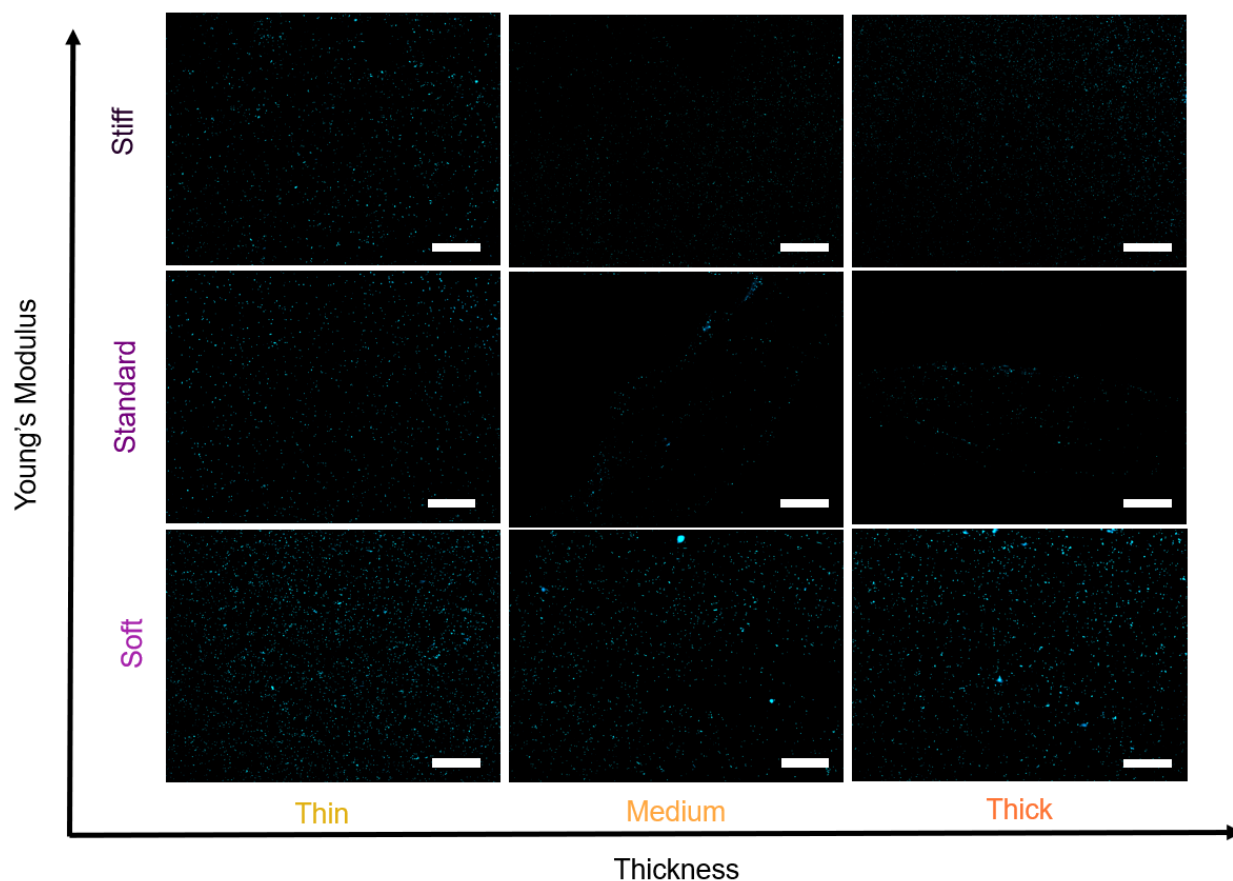

**Figure S4.** Representative micrographs of *E. coli* CFT073 adhered to various spin-coated PDMS stiffness-thickness combinations. A 100  $\mu\text{m}$  scale bar is displayed.

### Equation S1

$$\text{Reduction in Bacterial Area Coverage (\%)} = \frac{\text{Ave Area Coverage on Softer Gel} - \text{Ave Area Coverage on Stiffer Gel}}{\text{Ave Area Coverage on Softer Gel}} \quad (\text{S1})$$

**Table S4.** Change in *E. coli* Adhesion as a Function of PDMS Stiffness.

| <i>E. coli</i> Strain | Sample | Reduction in Bacterial Area Coverage (%) <sup>†</sup> |               |
|-----------------------|--------|-------------------------------------------------------|---------------|
|                       |        | Soft to Standard                                      | Soft to Stiff |
| K12 MG1655            | Thin   | 53.7                                                  | 85.1          |
| CFT073                | Thin   | 45.5                                                  | 63.7          |
| K12 MG1655            | Medium | 51.2                                                  | 84.2          |
| CFT073                | Medium | 46.6                                                  | 68.3          |
| K12 MG1655            | Thick  | 48.6                                                  | 84.4          |
| CFT073                | Thick  | 51.3                                                  | 76.5          |

<sup>†</sup>As calculated using Equation S1.

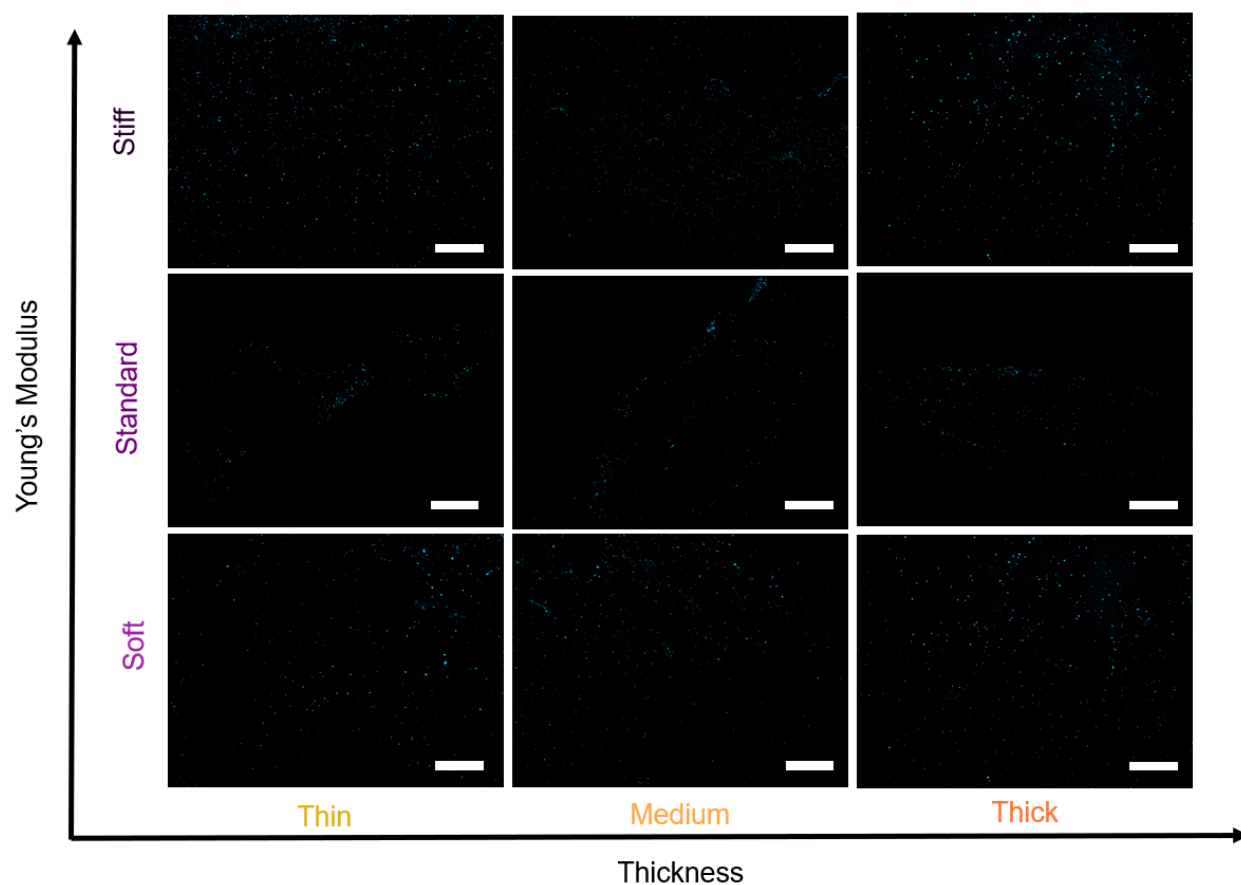

**Figure S5.** Representative micrographs of MRSA adhered to various spin-coated PDMS stiffness-thickness combinations. A 100  $\mu\text{m}$  scale bar is displayed.

**Table S5.** Change in *S. aureus* Adhesion as a Function of PDMS Stiffness.

| <i>S. aureus</i> Strain | Sample | Reduction in Bacterial Area Coverage (%) <sup>†</sup> |               |
|-------------------------|--------|-------------------------------------------------------|---------------|
|                         |        | Soft to Standard                                      | Soft to Stiff |
| SH1000                  | Thin   | 7.5                                                   | 13.7          |
| MRSA                    | Thin   | 32.2                                                  | 48.8          |
| SH1000                  | Medium | 12.5                                                  | 30.6          |
| MRSA                    | Medium | 40.1                                                  | 53.9          |
| SH1000                  | Thick  | 23.2                                                  | 56.3          |
| MRSA                    | Thick  | 40.1                                                  | 62.9          |

<sup>†</sup>As calculated using Equation S1.
